# Supplementary material
Source: publisher figshare collection journal article supplement (https://acs.figshare.com/ndownloader/files/11502932)
Supplement: Supplementary file 1 [file 11502932]

## Sheet: Promoters
Promoters
Native S. cerevisiae promoters	Sequence
THI4p	CGATTCTCGTACCGCTCAAGATTACTTTTTTAATTTTCATACTTTTTCTCCTAATATCTTGCAAATCATGACTGAATTGACATTAACTGATGCAAATGGGTGGGAAAAATGCTTATCAACCCCCTAAAAAGTCAACTTCTTCGTTAGTGATTGCTATATGTGGCGTCAAGAATTACAAGAAGCTGGCGAGCTTTCCAAGCCCCTTCAGGATTAACCGTTTTTTACCCTTTTTTTACAAATTTACGGCGGGGAATAATTCTGATACTTTCTCTTTATGAGCATTCCTCAACAGGGATCGGCACTCAATTGCTTTAGTGAATAGTTTTTTTTTACGCCAAGAACATTTACCACCCCATTTTCCTGTAGACGTCCAAAACGATACTCTACTTTAAGCCCTTT…
GAL1p	TGTGGAAATGTAAAGAGCCCCATTATCTTAGCCTAAAAAAACCTTCTCTTTGGAACTTTCAGTAATACGCTTAACTGCTCATTGCTATATTGAAGTACGGATTAGAAGCCGCCGAGCGGGCGACAGCCCTCCGACGGAAGACTCTCCTCCGTGCGTCCTGGTCTTCACCGGTCGCGTTCCTGAAACGCAGATGTGCCTCGCGCCGCACTGCTCCGAACAATAAAGATTCTACAATACTAGCTTTTATGGTTATGAAGAGGAAAAATTGGCAGTAACCTGGCCCCACAAACCTTCAAATCAACGAATCAAATTAACAACCATAGGATAATAATGCGATTAGTTTTTTAGCCTTATTTCTGGGGTAATTAATCAGCGAAGCGATGATTTTTGATCTATTAA…
TEF1p	CACACACCATAGCTTCAAAATGTTTCTACTCCTTTTTTACTCTTCCAGATTTTCTCGGACTCCGCGTATCGCCGTACCACTTCAAAACACCCAAGCACAGCATACTAAATTTCCCCTCTTTCTTCCTCTAGGGTGTCGTTAATTACCCGTACTAAAGGTTTGGAAAAGAAAAAACAGACCGCCTCGTTTCTTTTTCTTCGTCGAAAAAGGCAATAAAAATTTTTATCACGTTTCTTTTTCTTGAAAATTTTTTTTTTTGATTTTTTTCTCTTTCGATGACCTCCCATTGATATTTAAGTTAATAAACGCTCTTCAATTTCTCAAGTTTCAGTTTCATTTTTCTTGTTCTATTACAACTTTTTTTACTTCTTGCTCATTAGAAAGAAAGCATAGCAATCT…
TDH3p	GAATAAAAAACACGCTTTTTCAGTTCGAGTTTATCATTATCAATACTGCCATTTCAAAGAATACGTAAATAATTAATAGTAGTGATTTTCCTAACTTTATTTAGTCAAAAAATTAGCCTTTTAATTCTGCTGTAACCCGTACATGCCCAAAATAGGGGGCGGGTTACACAGAATATATAACATCGTAGGTGTCTGGGTGAACAGTTTATTCCTGGCATCCACTAAATATAATGGAGCCCGCTTTTTAAGCTGGCATCCAGAAAAAAAAAGAATCCCAGCACCAAAATATTGTTTTCTTCACCAACCATCAGTTCATAGGTCCATTCTCTTAGCGCAACTACAGAGAACAGGGGCACAAACAGGCAAAAAACGGGCACAACCTCAATGGAGTGATGCAAC…
PDC1p	CATGCGACTGGGTGAGCATATGTTCCGCTGATGTGATGTGCAAGATAAACAAGCAAGGCAGAAACTAACTTCTTCTTCATGTAATAAACACACCCCGCGTTTATTTACCTATCTCTAAACTTCAACACCTTATATCATAACTAATATTTCTTGAGATAAGCACACTGCACCCATACCTTCCTTAAAAACGTAGCTTCCAGTTTTTGGTGGTTCCGGCTTCCTTCCCGATTCCGCCCGCTAAACGCATATTTTTGTTGCCTGGTGGCATTTGCAAAATGCATAACCTATGCATTTAAAAGATTATGTATGCTCTTCTGACTTTTCGTGTGATGAGGCTCGTGGAAAAAATGAATAATTTATGAATTTGAGAACAATTTTGTGTTGTTACGGTATTTTACT…
Core promoters	Sequence
TDH3cp	AGCTGAAAAAAAAGGTTGAAACCAGTTCCCTGAAATTATTCCCCTACTTGACTAATAAGTATATAAAGACGGTAGGTATTGATTGTAATTCTGTAAATCTATTTCTTAAACTTCTTAAATTCTACTTTTATAGTTAGTCTTTTTTTTAGTTTTAAAACACCAAGAACTTAGTTTCGAATAAACACACATAA
ENO1cp	TCTCCCCGGAAACTGTGGCCTTTTCTGGCACACATGATCTCCACGATTTCAACATATAAATAGCTTTTGATAATGGCAATATTAATCAAATTTATTTTACTTCTTTCTTGTAACATCTCTCTTGTAATCCCTTATTCCTTCTAGCTATTTTTCATAAAAAACCAAGCAACTGCTTATCAACACACAAACAC
(ENO1_SrpR)cp	CTCCCCGGAAACTGTGGCCTTTTCTGGCACACATGATCTCCACGATTTCAACATATAAATAGCTTCATATACATACATGGTTGTTTGTTTGTAAACTAAGCCATATACATACATGCTTGTTTGTTTGTAAACTCTTGTAATCCCTTATTCCTTCTAGCTATTTTTCATAAAAAACCAAGCAACTGCTTATCAACACACAAACAC
(ENO1_PhlF)cp	CTCCCCGGAAACTGTGGCCTTTTCTGGCACACATGATCTCCACGATTTCAACATATAAATAGCTTTATGATACGAAACGTACCGTATCGTTAAGGTTAAGCCATGATACGAAACGTACCGTATCGTTAAGGTTCTTGTAATCCCTTATTCCTTCTAGCTATTTTTCATAAAAAACCAAGCAACTGCTTATCAACACACAAACAC
(ENO1_TetR)cp	CTCCCCGGAAACTGTGGCCTTTTCTGGCACACATGATCTCCACGATTTCAACATATAAATAGCTTTACTCCCTATCAGTGATAGAGATAAGCCACTCCCTATCAGTGATAGAGATCTTGTAATCCCTTATTCCTTCTAGCTATTTTTCATAAAAAACCAAGCAACTGCTTATCAACACACAAACAC
(ENO1_Bm3R1)cp	CTCCCCGGAAACTGTGGCCTTTTCTGGCACACATGATCTCCACGATTTCAACATATAAATAGCTTTCGGAATGAACATTCATTCCGAGAAGCTTGTCGGAATGAAGGTTCATTCCGTCTTGTAATCCCTTATTCCTTCTAGCTATTTTTCATAAAAAACCAAGCAACTGCTTATCAACACACAAACAC
(ENO1_LacI)cp	CTCCCCGGAAACTGTGGCCTTTTCTGGCACACATGATCTCCACGATTTCAACATATAAATAGCTTTAATTGTGAGCGGCTCACAATTTAAGCCAATTGTGAGCGGCTCACAATTTCTTGTAATCCCTTATTCCTTCTAGCTATTTTTCATAAAAAACCAAGCAACTGCTTATCAACACACAAACAC
PGK1cp	AAGGGGGTGGTTTAGTTTAGTAGAACCTCGTGAAACTTACATTTACATATATATAAACTTGCATAAATTGGTCAATGCAAGAAATACATATTTGGTCTTTTCTAATTCGTAGTTTTTCAAGTTCTTAGATGCTTTCTTTTTCTCTTTTTTACAGATCATCAAGGAAGTAATTATCTACTTTTTACAACAAA
(PGK1_SrpR)cp	GTTTAGTTTAGTAGAACCTCGTGAAACTTACATTTACATATATATAAACTTGCACATATACATACATGGTTGTTTGTTTGTAAACTAAGCCATTTACATACATTCTTGTTTGTTTGTAAACTAGTTTTTCAAGTTCTTAGATGCTTTCTTTTTCTCTTTTTTACAGATCATCAAGGAAGTAATTATCTACTTTTTACAACAAA
(PGK1_PhlF)cp	GTTTAGTTTAGTAGAACCTCGTGAAACTTACATTTACATATATATAAACTTGCATATGATACGAAACGTACCGTATCGTTAAGGTTAAGCCATGATACGGAACGTTACGTATCGTTAAGCTTAGTTTTTCAAGTTCTTAGATGCTTTCTTTTTCTCTTTTTTACAGATCATCAAGGAAGTAATTATCTACTTTTTACAACAAA
(PGK1_TetR)cp	GTTTAGTTTAGTAGAACCTCGTGAAACTTACATTTACATATATATAAACTTGCATACTCCCTATCAGTGATAGAGATAAGCCACTCCCTATCAGTGATAGAGATAGTTTTTCAAGTTCTTAGATGCTTTCTTTTTCTCTTTTTTACAGATCATCAAGGAAGTAATTATCTACTTTTTACAACAAA
(PGK1_Bm3R1)cp	GTTTAGTTTAGTAGAACCTCGTGAAACTTACATTTACATATATATAAACTTGCATCGGAATGAACATTCATTCCGAGAAGCTTGTCGGAATGAAGGTTCATTCCGTAGTTTTTCAAGTTCTTAGATGCTTTCTTTTTCTCTTTTTTACAGATCATCAAGGAAGTAATTATCTACTTTTTACAACAAA
(PGK1_LacI)cp	GTTTAGTTTAGTAGAACCTCGTGAAACTTACATTTACATATATATAAACTTGCATAATTGTGAGCGGCTCACAATTTAAGCCAATTGTGAGCGGCTCACAATTTAGTTTTTCAAGTTCTTAGATGCTTTCTTTTTCTCTTTTTTACAGATCATCAAGGAAGTAATTATCTACTTTTTACAACAAA
THI4cp	ATCATGAAATTGATTTTTTGATTTTCAATTTATGAACTACCCAGATATATAAATATTGGAATAAATTGTGTATTAAGTAGTCGGGAAATATCTTTTATGTTCTCTTTCTTATCATCTAGAAATAATAAATCACAACCAAAAAAATCAACTAAC
(THI4_SrpR)cp	ATCATGAAATTGATTTTTTGATTTTCAATTTATGAACTACCCAGATATATAAATATTGGATATACATACATGCTTGTTTGTTTGTAAACTAAGCCATATACATACATGCTTGTTTGTTTGTAAACATCTTTTATGTTCTCTTTCTTATCATCTAGAAATAATAAATCACAACCAAAAAAATCAACTAAC
(THI4_PhlF)cp	ATCATGAAATTGATTTTTTGATTTTCAATTTATGAACTACCCAGATATATAAATATTGGATGATACGAAACGTACCGTATCGTTAAGGTTAAGCCATGATACGAAACGTACCGTATCGTTAAGGTATCTTTTATGTTCTCTTTCTTATCATCTAGAAATAATAAATCACAACCAAAAAAATCAACTAAC
(THI4_TetR)cp	ATCATGAAATTGATTTTTTGATTTTCAATTTATGAACTACCCAGATATATAAATATTGGACTCCCTATCAGTGATAGAGATAAGCCACTCCCTATCAGTGATAGAGAATCTTTTATGTTCTCTTTCTTATCATCTAGAAATAATAAATCACAACCAAAAAAATCAACTAAC
(THI4_Bm3R1)cp	ATCATGAAATTGATTTTTTGATTTTCAATTTATGAACTACCCAGATATATAAATATTGGCGGAATGAACATTCATTCCGAGAAGCTTGTCGGAATGAAGGTTCATTCCGATCTTTTATGTTCTCTTTCTTATCATCTAGAAATAATAAATCACAACCAAAAAAATCAACTAAC
(THI4_LacI)cp	ATCATGAAATTGATTTTTTGATTTTCAATTTATGAACTACCCAGATATATAAATATTGGAATTGTGAGCGGCTCACAATTTAAGCCAATTGTGAGCGGCTCACAATTATCTTTTATGTTCTCTTTCTTATCATCTAGAAATAATAAATCACAACCAAAAAAATCAACTAAC
533cp	CGCCCCAAGAGAGCTGAAGATGCTGAGTAGGGTTGTCCAGGCAGCACATATATAAGATGCTTCGTCCCCTCCCATCGAGTCCTTCTTTTCTCTCTCTCATCAATCACTCTACTTCCTACTCTACCTTAAACTCTTCACTACTTCATACA
(533cp_SrpR)cp	CGCCCCAAGAGAGCTGAAGATGCTGAGTAGGGTTGTCCAGGCAGCACATATATAAGATGCTCATATACATACATGCTTGTTTGTTTGTAAACTTGTGAATTTACATACATTCTTGTTTGTTTGTAAACTCTTTTCTCTCTCTCATCAATCACTCTACTTCCTACTCTACCTTAAACTCTTCACTACTTCATACA
(533cp_PhlF)cp	CGCCCCAAGAGAGCTGAAGATGCTGAGTAGGGTTGTCCAGGCAGCACATATATAAGATGCTTATGATACGAAACGTACCGTATCGTTAAGGTTTGTGAATGATACGGAACGTTACGTATCGTTAAGCTTCTTTTCTCTCTCTCATCAATCACTCTACTTCCTACTCTACCTTAAACTCTTCACTACTTCATACA
(533cp_TetR)cp	CGCCCCAAGAGAGCTGAAGATGCTGAGTAGGGTTGTCCAGGCAGCACATATATAAGATGCTTACTCCCTATCAGTGATAGAGATTGTGAACTCCCTATCAGTGATAGAGATCTTTTCTCTCTCTCATCAATCACTCTACTTCCTACTCTACCTTAAACTCTTCACTACTTCATACA
(533cp_Bm3R1)cp	CGCCCCAAGAGAGCTGAAGATGCTGAGTAGGGTTGTCCAGGCAGCACATATATAAGATGCTTCGGAATGAACATTCATTCCGAGAAGCTTGTCGGAATGAAGGTTCATTCCGTCTTTTCTCTCTCTCATCAATCACTCTACTTCCTACTCTACCTTAAACTCTTCACTACTTCATACA
(533cp_LacI)cp	CGCCCCAAGAGAGCTGAAGATGCTGAGTAGGGTTGTCCAGGCAGCACATATATAAGATGCTTAATTGTGAGCGGCTCACAATTTTGTGAAATTGTGAGCGGCTCACAATTTCTTTTCTCTCTCTCATCAATCACTCTACTTCCTACTCTACCTTAAACTCTTCACTACTTCATACA
114cp	GCCCTGCAGTGCCTGATCACCTTATCAAGTGGCCAAATATCCCACTATAAAAGGCTTGGGAACCCCTCGTTCTGTCTTACCTTCTATCATCTTACCAAATCCACTCCTCTTCCTTCATACATCAATCTTACCAATCAACTACCTCTACAACTCCAATACAC
(114cp_SrpR)cp	GCCCTGCAGTGCCTGATCACCTTATCAAGTGGCCAAATATCCCACTATAAAAGGCTTGGATATACATACATGCTTGTTTGTTTGTAAACTAAGCCATATACATACATGCTTGTTTGTTTGTAAACCAAATCCACTCCTCTTCCTTCATACATCAATCTTACCAATCAACTACCTCTACAACTCCAATACAC
(114cp_PhlF)cp	GCCCTGCAGTGCCTGATCACCTTATCAAGTGGCCAAATATCCCACTATAAAAGGCTTGGATGATACGAAACGTACCGTATCGTTAAGGTTAAGCCATGATACGAAACGTACCGTATCGTTAAGGTCAAATCCACTCCTCTTCCTTCATACATCAATCTTACCAATCAACTACCTCTACAACTCCAATACAC
(114cp_TetR)cp	GCCCTGCAGTGCCTGATCACCTTATCAAGTGGCCAAATATCCCACTATAAAAGGCTTGGACTCCCTATCAGTGATAGAGATAAGCCACTCCCTATCAGTGATAGAGACAAATCCACTCCTCTTCCTTCATACATCAATCTTACCAATCAACTACCTCTACAACTCCAATACAC
(114cp_Bm3R1)cp	GCCCTGCAGTGCCTGATCACCTTATCAAGTGGCCAAATATCCCACTATAAAAGGCTTGGCGGAATGAACATTCATTCCGAGAAGCTTGTCGGAATGAAGGTTCATTCCGCAAATCCACTCCTCTTCCTTCATACATCAATCTTACCAATCAACTACCTCTACAACTCCAATACAC
(114cp_LacI)cp	GCCCTGCAGTGCCTGATCACCTTATCAAGTGGCCAAATATCCCACTATAAAAGGCTTGGAATTGTGAGCGGCTCACAATTTAAGCCAATTGTGAGCGGCTCACAATTCAAATCCACTCCTCTTCCTTCATACATCAATCTTACCAATCAACTACCTCTACAACTCCAATACAC
Tr123cp	ATCTTACAAAGTTGCTTGGCAGTAAACCGTGCAATGGACACCAGGTATAAAGTCAGTGATATCCTCCCCGAATTCAAAGTTTCATCACCAAGCTCCTCAATCAACTCTACTTGAACAATACTACAAACAACCAAACCTCATTCAACAAC
(Tr123_SrpR)cp	ATCTTACAAAGTTGCTTGGCAGTAAACCGTGCAATGGACACCAGGTATAAAGTCAGTGATATACATACATGCTTGTTTGTTTGTAAACTAAGCCATATACATACATGCTTGTTTGTTTGTAAACCATCACCAAGCTCCTCAATCAACTCTACTTGAACAATACTACAAACAACCAAACCTCATTCAACAAC
(Tr123_PhlF)cp	ATCTTACAAAGTTGCTTGGCAGTAAACCGTGCAATGGACACCAGGTATAAAGTCAGTGATGATACGAAACGTACCGTATCGTTAAGGTTAAGCCATGATACGAAACGTACCGTATCGTTAAGGTCATCACCAAGCTCCTCAATCAACTCTACTTGAACAATACTACAAACAACCAAACCTCATTCAACAAC
(Tr123_TetR)cp	ATCTTACAAAGTTGCTTGGCAGTAAACCGTGCAATGGACACCAGGTATAAAGTCAGTGACTCCCTATCAGTGATAGAGATAAGCCACTCCCTATCAGTGATAGAGACATCACCAAGCTCCTCAATCAACTCTACTTGAACAATACTACAAACAACCAAACCTCATTCAACAAC
(Tr123_Bm3R1)cp	ATCTTACAAAGTTGCTTGGCAGTAAACCGTGCAATGGACACCAGGTATAAAGTCAGTGCGGAATGAACATTCATTCCGAGAAGCTTGTCGGAATGAAGGTTCATTCCGCATCACCAAGCTCCTCAATCAACTCTACTTGAACAATACTACAAACAACCAAACCTCATTCAACAAC
(Tr123_LacI)cp	ATCTTACAAAGTTGCTTGGCAGTAAACCGTGCAATGGACACCAGGTATAAAGTCAGTGAATTGTGAGCGGCTCACAATTTAAGCCAATTGTGAGCGGCTCACAATTCATCACCAAGCTCCTCAATCAACTCTACTTGAACAATACTACAAACAACCAAACCTCATTCAACAAC

## Sheet: ORFs
	Open reading frames
	Synthetic transcription factors	Sequence
	LexA-NLS-VP16	ATGAAAGCGTTAACGGCCAGGCAACAAGAGGTGTTTGATCTCATCCGTGATCACATCAGCCAGACAGGTATGCCGCCGACGCGTGCGGAAATCGCGCAGCGTTTGGGGTTCCGTTCCCCAAACGCGGCTGAAGAACATCTGAAGGCGCTGGCACGCAAAGGCGTTATTGAAATTGTTTCCGGCGCATCACGCGGGATTCGTCTGTTGCAGGAAGAGGAAGAAGGGTTGCCGCTGGTAGGTCGTGTGGCTGCCGGTGAACCACTTCTGGCGCAACAGCATATTGAAGGTCATTATCAGGTCGATCCTTCCTTATTCAAGCCGAATGCTGATTTCCTGCTGCGCGTCAGCGGGATGTCGATGAAAGATATCGGCATTATGGATGGTGACTTGCTGGCAGTG…
	SrpR-NLS-VP16	ATGGCAAGAAAAACAGCAGCGGAAGCCGAAGAAACACGTCAAAGAATTATTGATGCTGCACTAGAAGTGTTCGTAGCTCAAGGAGTGTCAGATGCAACATTAGACCAAATCGCAAGAAAAGCAGGTGTTACCAGAGGTGCTGTTTACTGGCACTTCAACGGGAAATTAGAAGTATTACAAGCTGTGCTGGCGTCAAGACAACATCCTTTAGAATTGGACTTTACACCAGATTTGGGTATAGAAAGATCTTGGGAAGCTGTGGTAGTTGCAATGTTAGACGCAGTTCATTCACCCCAAAGTAAACAGTTCAGTGAAATACTGATTTACCAAGGTTTAGACGAATCTGGATTGATACACAACAGAATGGTTCAGGCATCCGATAGATTTCTACAATACATA…
	PhlF-NLS-VP16	ATGGCCAGGACCCCTTCAAGGTCCAGTATTGGTTCATTACGTAGTCCGCATACCCATAAGGCAATTTTGACATCAACCATTGAGATTTTAAAAGAATGCGGATACTCTGGTTTATCAATTGAATCTGTTGCCCGTAGAGCTGGTGCATCAAAACCCACAATTTATAGGTGGTGGACAAACAAAGCAGCCTTGATTGCCGAGGTTTACGAAAACGAATCCGAGCAAGTTAGGAAATTTCCCGATTTGGGTTCTTTCAAGGCTGATTTAGACTTTTTGCTGAGAAATCTGTGGAAAGTTTGGAGGGAAACTATTTGCGGTGAAGCGTTCAGATGCGTTATCGCTGAAGCTCAGTTGGACCCTGCTACACTAACGCAATTAAAGGATCAATTTATGGAGAGA…
	TetR-NLS-VP16	ATGAGTAGATTAGACAAATCAAAAGTGATAAATTCTGCATTAGAATTGTTGAATGAAGTAGGCATTGAAGGTTTGACTACCCGTAAGTTAGCTCAGAAACTAGGTGTTGAACAACCTACATTATACTGGCACGTTAAAAATAAAAGGGCATTGTTGGATGCGCTTGCCATTGAGATGTTGGATAGGCATCATACCCACTTTTGCCCATTAGAAGGAGAGTCTTGGCAGGACTTTTTGAGGAATAATGCCAAGTCATTTAGATGTGCATTGTTGTCTCATAGAGATGGGGCCAAGGTTCATCTAGGTACCCGTCCTACGGAAAAACAATATGAGACGTTGGAAAATCAGTTAGCGTTCTTATGCCAACAAGGCTTTAGCTTGGAAAATGCTTTATATGCT…
	Bm3R1-NLS-VP16	ATGGAATCTACTCCTACTAAGCAAAAAGCCATCTTCTCTGCCTCCTTGTTGTTGTTCGCTGAGAGAGGTTTCGACGCTACCACTATGCCAATGATTGCCGAAAACGCTAAGGTTGGTGCTGGTACTATCTACAGATACTTCAAGAACAAAGAATCCTTAGTTAATGAGTTGTTTCAACAACACGTCAATGAATTTTTGCAATGTATCGAATCTGGTTTGGCTAACGAAAGAGATGGTTACAGAGACGGTTTCCACCACATCTTCGAAGGTATGGTCACCTTCACCAAGAACCATCCTAGAGCCTTAGGTTTCATCAAGACCCACTCTCAAGGTACTTTTTTGACCGAAGAATCCAGATTGGCTTATCAAAAGTTGGTCGAATTTGTCTGTACTTTCTTC…
	TarA-NLS-VP16	ATGGCCCAACAAGATAGAGCCGTCAGAACCAGAAGAGCCGTTTTGCGTGCTGCTGCCGCTGTCTTCGCCGAAAGAGGTTACGCTGCCGCTACTATCTCCGAAATTTTGAAGAGAGCTGGTGTTACCAAGGGTGCTTTATACTTCCACTTTGATTCCAAAGCTGCTTTGGCCCAAGGTGTTTTGCAAGAACAATTGACTCCTGAATACCACTTGCCAAGAGAGTTGAAGTTGCAAGAATGGGTTGACGCTGGTATGACCTTGGCTAGAAGATTGCCAAGAGAGCCATTCTTGTTGGCTGGTGTTAGAATCTCTGCCGATAGACCAGGTAGAGAAGTCTTGGGTTCTGCTTGGCCAGCTTGGTCTCGTTTGACTTCCCATGTTTTGACCGAAGCTAAGAAG…
	IscR-NLS-VP16	ATGCGTTTGACTACTAAGGGTAGATACGCTGTTACCGCTATGTTGGACTTGGCTTTGCATGCTCAACAAGGTCCAGTTTCTTTGGCTGACATTTCTGAAAGACAAGGTATCTCCTTATCCTATTTGGAACAATTGTTCGCCAAGTTGCGTAGAGGTAACTTGGTTACCTCTGTCAGAGGTCCAGGTGGTGGTTATCAATTGTCCAGACACATGTCCGGTATTCATGTTGCTCAAGTTATTGATGCTGTTAACGAATCTGTTGATGCTACCAGATGTCAAGGTCAAGGTGATTGTCACTCCGGTGACACTTGTTTAACCCACCACTTGTGGTGCGACTTATCTTTACAAATTCATGAATTTTTGTCCGGCATCTCTTTGGCTGACTTGGTTTCCAGACAA…
	BrlR-NLS-VP16	ATGTTGACCATCGGTCAATTAGCTAGAATTTTTGAAATTTCTACTAAGACTTTGAGACATTATGATGCTATTGGTTTATTTGTTCCAGCTAGAACTGGTTCCGACAACGGTTACAGATACTACCAACCAGAACAAATTGAACAATTGTCCAGAATTTTGGCCTTAAGAAGATTGGACGTTCCATTGGAAGCTATTGACAGATTAAAAAGAGATGGTGCCTTAGATGATCCTCAAAGATTGCGTCATTTTTTGCAAAGACACCAACATACTTTAAGAGAAGAAATTTCTGCCAGACAAAGATTATTGGCTGAATTGGATAGAACTTTGGCTACCTTAGCCCACTGGAGAATCAGAAACATGCACGCCAGAATCGTCGAAAGACCTGCTTTCTCTGTTGTC…
	LacI-NLS-VP16	ATGAAGCCAGTTACGTTATACGATGTGGCCGAGTATGCGGGTGTATCCTATCAAACAGTTTCCAGAGTTGTGAACCAAGCGAGTCATGTTAGTGCAAAAACCAGAGAAAAAGTAGAAGCCGCCATGGCTGAATTAAACTATATTCCCAATAGAGTTGCTCAGCAATTGGCGGGTAAACAGTCATTATTAATAGGTGTTGCAACTTCTTCTTTAGCTCTTCATGCTCCATCACAAATTGTTGCAGCAATAAAGAGTAGAGCAGACCAATTGGGCGCATCTGTTGTAGTTTCCATGGTCGAAAGAAGTGGTGTCGAGGCATGTAAAGCAGCTGTACACAACCTATTAGCCCAAAGGGTGTCCGGTCTTATAATCAATTATCCATTAGATGATCAAGATGCG…
	Orf2-NLS-VP16	ATGCAACAACAGCATGAAGTAGCAGCACGTGTTCGTAGGGTAATTGATGCAGCCGGGGTGTCCGCAAGAGAATTTGCCAGGCGTATCGTTATCGATAGACGTTCCTCCCCGGGTCCTTCCACAGCACCTGGAGCTTCCCCTCCTCCTAATTGGCCAGGATCCCGTACGCCTGCCGCTTGGACCTGGGATGGTTGCAGTGGTTTAAGACCTGTAAGGAGGAGAAGAAGCACTGTAAGATCTCCAAGTGCTCCAAGATTGCCACCAGCCAGCACCGAAGGAGGAAGGCCTCTACAAATAGTTCGTGAAACAGTTAGATTAATAGCAGAAAGAGGCTTTCATGCCGTGAGGGTCGCTGATATTGCTGCCGCGTGTCATACTTCTACTGCAGCAATACATTAT…
	GalR-NLS-VP16	ATGGCAACCATTAAAGATGTTGCTAGATTGGCCGGTGTTTCCGTTGCAACTGTTAGTCGTGTTATAAACAATAGTCCAAAGGCATCTGAAGCTTCAAGACTTGCAGTCCACTCCGCTATGGAAAGTCTTAGCTATCATCCTAATGCTAATGCGCGTGCTCTAGCACAGCAAACAACGGAAACAGTCGGCCTTGTGGTTGGTGATGTCTCCGATCCTTTTTTTGGTGCTATGGTCAAGGCAGTTGAACAAGTTGCTTACCACACAGGGAATTTTCTACTGATCGGTAACGGCTACCATAACGAACAGAAGGAAAGACAAGCTATTGAGCAATTGATCAGGCATAGATGCGCTGCATTGGTGGTGCATGCTAAAATGATTCCAGATGCCGATTTAGCATCA…
	TetR-NLS-B42	ATGAGTAGATTAGACAAATCAAAAGTGATAAATTCTGCATTAGAATTGTTGAATGAAGTAGGCATTGAAGGTTTGACTACCCGTAAGTTAGCTCAGAAACTAGGTGTTGAACAACCTACATTATACTGGCACGTTAAAAATAAAAGGGCATTGTTGGATGCGCTTGCCATTGAGATGTTGGATAGGCATCATACCCACTTTTGCCCATTAGAAGGAGAGTCTTGGCAGGACTTTTTGAGGAATAATGCCAAGTCATTTAGATGTGCATTGTTGTCTCATAGAGATGGGGCCAAGGTTCATCTAGGTACCCGTCCTACGGAAAAACAATATGAGACGTTGGAAAATCAGTTAGCGTTCTTATGCCAACAAGGCTTTAGCTTGGAAAATGCTTTATATGCT…
	Bm3R1-NLS-VP16-Cln2_short	ATGGAATCTACTCCTACTAAGCAAAAAGCCATCTTCTCTGCCTCCTTGTTGTTGTTCGCTGAGAGAGGTTTCGACGCTACCACTATGCCAATGATTGCCGAAAACGCTAAGGTTGGTGCTGGTACTATCTACAGATACTTCAAGAACAAAGAATCCTTAGTTAATGAGTTGTTTCAACAACACGTCAATGAATTTTTGCAATGTATCGAATCTGGTTTGGCTAACGAAAGAGATGGTTACAGAGACGGTTTCCACCACATCTTCGAAGGTATGGTCACCTTCACCAAGAACCATCCTAGAGCCTTAGGTTTCATCAAGACCCACTCTCAAGGTACTTTTTTGACCGAAGAATCCAGATTGGCTTATCAAAAGTTGGTCGAATTTGTCTGTACTTTCTTC…
	TetR-NLS-VP16 (opt)	ATGAGTAGATTAGACAAATCAAAAGTGATAAATTCTGCATTAGAATTGTTGAATGAAGTAGGCATTGAAGGTTTGACTACCCGTAAGTTAGCTCAGAAACTAGGTGTTGAACAACCTACATTATACTGGCACGTTAAAAATAAAAGGGCATTGTTGGATGCGCTTGCCATTGAGATGTTGGATAGGCATCATACCCACTTTTGCCCATTAGAAGGAGAGTCTTGGCAGGACTTTTTGAGGAATAATGCCAAGTCATTTAGATGTGCATTGTTGTCTCATAGAGATGGGGCCAAGGTTCATCTAGGTACCCGTCCTACGGAAAAACAATATGAGACGTTGGAAAATCAGTTAGCGTTCTTATGCCAACAAGGCTTTAGCTTGGAAAATGCTTTATATGCT…
	Synthetic repressors	Sequence
	SrpR-NLS	ATGGCAAGAAAAACAGCAGCGGAAGCCGAAGAAACACGTCAAAGAATTATTGATGCTGCACTAGAAGTGTTCGTAGCTCAAGGAGTGTCAGATGCAACATTAGACCAAATCGCAAGAAAAGCAGGTGTTACCAGAGGTGCTGTTTACTGGCACTTCAACGGGAAATTAGAAGTATTACAAGCTGTGCTGGCGTCAAGACAACATCCTTTAGAATTGGACTTTACACCAGATTTGGGTATAGAAAGATCTTGGGAAGCTGTGGTAGTTGCAATGTTAGACGCAGTTCATTCACCCCAAAGTAAACAGTTCAGTGAAATACTGATTTACCAAGGTTTAGACGAATCTGGATTGATACACAACAGAATGGTTCAGGCATCCGATAGATTTCTACAATACATA…
	PhlF-NLS	ATGGCCAGGACCCCTTCAAGGTCCAGTATTGGTTCATTACGTAGTCCGCATACCCATAAGGCAATTTTGACATCAACCATTGAGATTTTAAAAGAATGCGGATACTCTGGTTTATCAATTGAATCTGTTGCCCGTAGAGCTGGTGCATCAAAACCCACAATTTATAGGTGGTGGACAAACAAAGCAGCCTTGATTGCCGAGGTTTACGAAAACGAATCCGAGCAAGTTAGGAAATTTCCCGATTTGGGTTCTTTCAAGGCTGATTTAGACTTTTTGCTGAGAAATCTGTGGAAAGTTTGGAGGGAAACTATTTGCGGTGAAGCGTTCAGATGCGTTATCGCTGAAGCTCAGTTGGACCCTGCTACACTAACGCAATTAAAGGATCAATTTATGGAGAGA…
	TetR-NLS	ATGAGTAGATTAGACAAATCAAAAGTGATAAATTCTGCATTAGAATTGTTGAATGAAGTAGGCATTGAAGGTTTGACTACCCGTAAGTTAGCTCAGAAACTAGGTGTTGAACAACCTACATTATACTGGCACGTTAAAAATAAAAGGGCATTGTTGGATGCGCTTGCCATTGAGATGTTGGATAGGCATCATACCCACTTTTGCCCATTAGAAGGAGAGTCTTGGCAGGACTTTTTGAGGAATAATGCCAAGTCATTTAGATGTGCATTGTTGTCTCATAGAGATGGGGCCAAGGTTCATCTAGGTACCCGTCCTACGGAAAAACAATATGAGACGTTGGAAAATCAGTTAGCGTTCTTATGCCAACAAGGCTTTAGCTTGGAAAATGCTTTATATGCT…
	Bm3R1-NLS	ATGGAATCTACTCCTACTAAGCAAAAAGCCATCTTCTCTGCCTCCTTGTTGTTGTTCGCTGAGAGAGGTTTCGACGCTACCACTATGCCAATGATTGCCGAAAACGCTAAGGTTGGTGCTGGTACTATCTACAGATACTTCAAGAACAAAGAATCCTTAGTTAATGAGTTGTTTCAACAACACGTCAATGAATTTTTGCAATGTATCGAATCTGGTTTGGCTAACGAAAGAGATGGTTACAGAGACGGTTTCCACCACATCTTCGAAGGTATGGTCACCTTCACCAAGAACCATCCTAGAGCCTTAGGTTTCATCAAGACCCACTCTCAAGGTACTTTTTTGACCGAAGAATCCAGATTGGCTTATCAAAAGTTGGTCGAATTTGTCTGTACTTTCTTC…
	LacI-NLS	ATGAAGCCAGTTACGTTATACGATGTGGCCGAGTATGCGGGTGTATCCTATCAAACAGTTTCCAGAGTTGTGAACCAAGCGAGTCATGTTAGTGCAAAAACCAGAGAAAAAGTAGAAGCCGCCATGGCTGAATTAAACTATATTCCCAATAGAGTTGCTCAGCAATTGGCGGGTAAACAGTCATTATTAATAGGTGTTGCAACTTCTTCTTTAGCTCTTCATGCTCCATCACAAATTGTTGCAGCAATAAAGAGTAGAGCAGACCAATTGGGCGCATCTGTTGTAGTTTCCATGGTCGAAAGAAGTGGTGTCGAGGCATGTAAAGCAGCTGTACACAACCTATTAGCCCAAAGGGTGTCCGGTCTTATAATCAATTATCCATTAGATGATCAAGATGCG…
	Fluorescent proteins	Sequence
	STREP-Venus	ATGTGGTCTCATCCACAATTTGAAAAATCTAAAGGTGAAGAATTATTCACTGGTGTTGTCCCAATTTTGGTTGAATTAGATGGTGATGTTAATGGTCACAAATTTTCTGTCTCCGGTGAAGGTGAAGGTGATGCTACTTACGGTAAATTGACCTTAAAATTGATTTGTACTACTGGTAAATTGCCAGTTCCATGGCCAACCTTAGTCACTACTTTAGGTTATGGTTTGCAATGTTTTGCTAGATACCCAGATCATATGAAACAACATGACTTTTTCAAGTCTGCCATGCCAGAAGGTTATGTTCAAGAAAGAACTATTTTTTTCAAAGATGACGGTAACTACAAGACCAGAGCTGAAGTCAAGTTTGAAGGTGATACCTTAGTTAATAGAATCGAATTA…
	BFP2	ATGAGTGAGTTGATTAAGGAAAACATGCACATGAAGTTGTACATGGAAGGAACAGTAGATAATCATCATTTCAAATGTACGTCAGAAGGTGAGGGCAAACCTTATGAAGGAACTCAAACTATGAGAATTAAAGTCGTTGAGGGTGGCCCACTACCATTTGCATTCGATATCCTCGCAACATCTTTTCTGTATGGTTCTAAAACCTTTATCAACCATACACAAGGCATACCAGATTTCTTTAAGCAATCATTTCCTGAAGGTTTCACATGGGAAAGAGTAACTACCTATGAAGATGGTGGTGTCCTTACAGCTACTCAAGACACGTCTTTGCAGGATGGTTGTTTAATCTACAATGTTAAGATAAGAGGAGTGAACTTTACATCCAATGGACCAGTCATG…
	mCherry	ATGGTGAGCAAGGGCGAGGAGGATAACATGGCCATCATCAAGGAGTTCATGCGCTTCAAGGTGCACATGGAGGGCTCCGTGAACGGCCACGAGTTCGAGATCGAGGGCGAGGGCGAGGGCCGCCCCTACGAGGGCACCCAGACCGCCAAGCTGAAGGTGACCAAGGGTGGCCCCCTGCCCTTCGCCTGGGACATCCTGTCCCCTCAGTTCATGTACGGCTCCAAGGCCTACGTGAAGCACCCCGCCGACATCCCCGACTACTTGAAGCTGTCCTTCCCCGAGGGCTTCAAGTGGGAGCGCGTGATGAACTTCGAGGACGGCGGCGTGGTGACCGTGACCCAGGACTCCTCCCTGCAGGACGGCGAGTTCATCTACAAGGTGAAGCTGCGCGGCACCAAC…
	KO2	ATGGTGTCCGTAATTAAGCCAGAAATGAAGATGAGGTATTACATGGATGGTTCTGTCAATGGACACGAGTTTACTATTGAAGGTGAGGGTACGGGCAGACCTTACGAAGGCCATCAAGAGATGACATTAAGAGTAACTATGGCTGAAGGAGGTCCAATGCCTTTCGCTTTCGACTTAGTTTCTCATGTGTTTTGTTACGGGCATCGTGTGTTTACTAAGTACCCTGAAGAGATACCAGATTACTTTAAACAAGCCTTCCCAGAGGGACTTTCATGGGAAAGATCCCTTGAATTTGAAGATGGAGGGAGTGCTTCAGTTTCTGCACATATCAGCTTGAGAGGTAACACATTTTACCACAAATCAAAATTCACAGGCGTCAACTTCCCTGCCGATGGGCCA…
	Violacein pathway genes	Sequence
	VioA	ATGAAACACTCATCTGACATCTGTATTGTCGGTGCTGGTATTTCAGGTTTGACCTGTGCTTCTCACTTGTTAGATTCACCAGCTTGTAGAGGTTTGTCCTTAAGAATCTTTGACATGCAACAAGAAGCAGGTGGTAGAATAAGAAGTAAAATGTTGGACGGTAAAGCATCCATCGAATTAGGTGCAGGTAGATATTCACCACAATTGCATCCACATTTTCAATCAGCAATGCAACACTACTCCCAAAAATCCGAAGTTTATCCATTCACTCAATTAAAATTCAAATCCCATGTTCAACAAAAATTGAAGAGAGCTATGAACGAATTGTCCCCAAGATTGAAAGAACATGGTAAAGAATCCTTTTTGCAATTCGTTTCAAGATACCAAGGTCATGATTCA…
	VioB	ATGTCAATTTTAGATTTTCCTAGAATACACTTCAGAGGTTGGGCAAGAGTCAATGCTCCTACTGCAAACAGAGATCCACACGGTCATATTGATATGGCCTCCAATACAGTCGCAATGGCTGGTGAACCTTTCGATTTGGCAAGACATCCTACCGAATTTCACAGACATTTGAGATCCTTGGGTCCAAGATTCGGTTTGGATGGTAGAGCAGATCCTGAAGGTCCATTTTCCTTGGCCGAAGGTTACAACGCTGCTGGTAATAACCATTTCAGTTGGGAATCCGCAACCGTATCACATGTTCAATGGGATGGTGGTGAAGCAGATAGAGGTGACGGTTTGGTTGGTGCCAGATTAGCATTATGGGGTCACTACAATGACTACTTAAGAACAACCTTCAAT…
	VioC	ATGAAGAGAGCAATTATCGTCGGTGGTGGTTTAGCAGGTGGTTTAACAGCAATCTATTTGGCAAAGAGAGGTTATGAAGTACACGTAGTCGAAAAGAGAGGTGACCCATTGAGAGACTTATCAAGTTATGTAGATGTTGTTTCTTCCAGAGCTATCGGTGTTTCAATGACAGTTAGAGGTATCAAGTCCGTTTTAGCAGCCGGTATTCCTAGAGCCGAATTAGACGCATGTGGTGAACCAATTGTTGCAATGGCTTTCTCAGTTGGTGGTCAATATAGAATGAGAGAATTAAAACCTTTGGAAGATTTTAGACCATTATCCTTGAATAGAGCTGCTTTCCAAAAATTATTGAACAAGTACGCCAATTTGGCTGGTGTTAGATATTACTTCGAACATAAA…
	VioD	ATGAAGATTTTAGTTATCGGTGCCGGTCCAGCAGGTTTGGTTTTCGCATCACAATTGAAGCAAGCAAGACCTTTATGGGCTATAGACATCGTAGAAAAGAATGATGAACAAGAAGTTTTAGGTTGGGGTGTTGTCTTACCAGGTAGACCAGGTCAACATCCAGCCAATCCATTGTCATACTTGGATGCACCAGAAAGATTGAACCCTCAATTCTTGGAAGATTTTAAATTGGTTCACCATAACGAACCATCCTTAATGTCCACAGGTGTTTTATTGTGTGGTGTTGAAAGAAGAGGTTTGGTTCATGCTTTAAGAGATAAATGTAGATCTCAAGGTATCGCAATTAGATTTGAATCACCTTTATTGGAACACGGTGAATTGCCTTTGGCAGATTATGAC…
	Vio E	ATGGAAAACAGAGAACCTCCTTTATTGCCTGCTAGATGGTCAAGTGCCTATGTATCCTATTGGTCACCTATGTTGCCAGACGATCAATTAACTTCCGGTTACTGTTGGTTTGATTATGAAAGAGATATCTGTAGAATTGATGGTTTGTTTAACCCTTGGTCAGAAAGAGATACTGGTTATAGATTGTGGATGTCCGAAGTTGGTAATGCAGCTTCAGGTAGAACTTGGAAACAAAAGGTTGCTTACGGTAGAGAAAGAACAGCTTTGGGTGAACAATTGTGCGAAAGACCATTGGACGATGAAACTGGTCCATTTGCTGAATTATTTTTGCCAAGAGATGTCTTAAGAAGATTGGGTGCTAGACATATTGGTAGAAGAGTTGTCTTGGGTAGAGAAGCA…
	CRISPR transformation	Sequence
	Cas9	ATGGATAAGAAATACTCAATCGGTTTAGACATAGGTACAAACTCCGTTGGTTGGGCTGTCATAACTGATGAATACAAAGTCCCTTCCAAAAAGTTCAAAGTTTTGGGTAACACAGATAGACATTCTATTAAAAAGAACTTGATCGGTGCTTTGTTATTTGATTCAGGTGAAACAGCAGAAGCCACCAGATTGAAGAGAACAGCAAGAAGAAGATACACCAGAAGAAAGAATAGAATCTGTTATTTGCAAGAAATCTTTTCTAACGAAATGGCTAAGGTAGATGACTCTTTCTTTCATAGATTGGAAGAATCATTTTTGGTTGAAGAAGATAAAAAGCATGAAAGACACCCAATTTTCGGTAATATAGTCGATGAAGTAGCATACCATGAAAAGTACCCT…

## Sheet: Binding sites
sTF and sRep binding sites
Binding site	Version	Sequence
LexA	1	CTGTATGTACATACAG
	2	CTGTATATATATACAG
	3	CTGTATGCGCATACAG
	4	CTGTATATATATACAG
SrpR	1	ATATACATACATGCTTGTTTGTTTGTAAAC
PhlF	1	ATGATACGAAACGTACCGTATCGTTAAGGT
TetR	1	ACTCCCTATCAGTGATAGAGA
	2	ACTCCTATCAGTGATAGAGA
Bm3R1	1	CGGAATGAACATTCATTCCG
	2	CGGAATGAAGGTTCATTCCG
	3	CGGAATGAACTTTCATTCCG
TarA	1	AAACATACCGTGTGGTATGTTC
	2	AACATACCGAGTGGTATGTT
	3	AACATACCGTGAGGTATGTT
LacI	1	AATTGTGAGCGGCTCACAATT
IscR	1	AAACCCGAGGTTTTCGCTCGGGTAAA
	2	AAACCCGAGTAATTTGATCAACTATA
	3	AAATCCCGAGTATTTAGATCGGCTAA
	4	AAACCCGAGTAATTAGATCGGCTATA
GalR	1	GTGTAAACGATTACAC
	2	GTGTAATCGATTACAC
	3	GTGTAACCGATTACAC
	4	GTGTAAGCGATTACAC
Orf2	1	CTAACTGCTGTTCAGTTAGGTT
BrlR	1	TGACCTTGCCCCAGGGGCAATCCGTAGT
	2	TGACCTTGCCCCTGGGGCAATCCGTAGT
	3	ATGTCCTTGCCCCAGGGGCAATCCGAAG

## Sheet: Primers
qPCR primers for gene copy number and transcription analysis
Primer number	Target	Primer name	Sequence
890	mCherry	mCherry_qPCR_F	GTGATGAACTTCGAGGACGG
891		mCherry_qPCR_R	TTCAGCCTCTGCTTGATCTC
1221	Venus	Venus_qPCR_F	CACAATGTTTACATCACTGCTG
1222		Venus_qPCR_R	CTTTGGATAAGGCAGATTGATAGG
1215	KO2	KO2_qPCR_F	TTTCTGCACATATCAGCTTGAGAG
1216		KO2_qPCR_R	GCATTTGTGATTACCACCTCC
1217	BFP	BFP2_qPCR_F	GTGGTGTCCTTACAGCTACTC
1218		BFP2_qPCR_R	TTAAAGCCATGTCATTTCTCCC
1121	LexA	LexA_qPCR_F	CGATCCTTCCTTATTCAAGCC
1122		LexA_qPCR_R	AACAGTTCGACTTTATTGCCC
1171	SrpR	SrpR_qPCR_F	CCAAGGTTTAGACGAATCTGG
1172		SrpR_qPCR_R	ACCTTCGTAAAGCAATCCTG
1173	PhlF	PhlF_qPCR_F	GCTACACTAACGCAATTAAAGG
1174		PhlF_qPCR_R	ATTCCTCAATGTCTTGCTCCA
1167	TetR	TetR_qPCR_F	ATCAGTTAGCGTTCTTATGCCA
1168		TetR_qPCR_R	AATTCGATAGCTTGTCTCAGTAGG
1308	Bm3R1	Bm3R1_qPCR_F	TCACCAAGAACCATCCTAGAG
1309		Bm3R1_qPCR_R	GAAAGAACCGAACAAGATAGCA
1310	TarA	TarA_qPCR_F	TTAGAATCTCTGCCGATAGACC
1311		TarA_qPCR_R	ATCCAAGTCTTCCCAACCAG
1165	LacI	LacI_qPCR_F	ACCAGAAACCAGATTCAACC
1166		LacI_qPCR_R	CCAACAACTGATATGTCTGCT
1189	UBC6	UBC6_qPCR_F	ACTTTCCCGTCTGATTATCCA
1190		UBC6_qPCR_R	TAATTGATCCTGTCGTGGCT
1419	TEF1	TEF1_qPCR_F	AACATGATTGAAGCTACCACC
1420		TEF1_qPCR_R	GCACAGTACCAATACCACCA
1148	TDH3	TDH3_qPCR_F	TAACATCATCCCATCCTCCAC
1149		TDH3_qPCR_R	AACACCCTTCAACTTACCTTCAG
146	VioC	VioC_qPCR_F	TGTTGTTAGGTGACGCAGCT
147		VioC_qPCR_R	CTTGCATTGCGTCAGCTTGA
144	VioD	VioD_qPCR_F	TATGGCTGTTGTAGTCGCCC
145		VioD_qPCR_R	TTCTGCGGATGACAAGTGCA
2138	Bm3R1-sTF (bi-stable switch cDNA)	533cp_qPCR_F	CCTTAAACTCTTCACTACTTCATACATT
2139		BMR_qPCR_R	GTGTTGTTGAAACAACTCATTAACTAAGG
2136	TetR-sTF (bi-stable switch cDNA)	ENO1cp_qPCR_F	CAACTGCTTATCAACACACAAACAC
2137		TetR_qPCR_R	TCTCAATGGCAAGCGCATCC
1914	BMR-VP16-Cln2-Sh (bi-stable switch cDNA)	Cln2Sh_URA3t_qPCR_F	GCTCTTTATCCGACAACTCTG
1915		Cln2Sh_URA3t_qPCR_R	TCATTACGACCGAGATTCCC
1811	TetR-B42 (bi-stable switch cDNA)	Tet_B42_qPCR_F	TTATTTGATCATCAAGGTGCGG
1812		Tet_B42_qPCR_R	ATGATGGCATTGCACTCC
Primers for VioABE cassette transformation
Primer name	Sequence
oCC-121	AAGACAAAGAAATTGCATTGTCTATAACGATAACAAAAGACATCGTATATATATATATATCACACACCATAGCTTCAAAATG
oCC-122	TAATGAAACGTCTATTTTTTTATTTTTTTCTATTTTGAAGGCATGCAAGAGGTTCTGTGATATATAACAGTTGAAATTTGGATAAG

## Sheet: S. cerevisiae strains
	Strain number	Genotype (parental strain + expression cassette)	Analysis of orthogonal activators	Analysis of orthogonal repressors
Parental strains	H3891	H3891		*
	H3895	H3895
	H3888	H3888
	H3899	H3899
	H3900	H3900
sTF expression strains	H4489	H3900 + pHISin-TDH3cp-LexA-VP16
	H4766	H3900 + pHISin-TDH3cp-LexA-VP16 + pURA (selection marker only)
	H4585	H3900 + pURAin-TDH3cp-LexA-VP16
	H4586	H3900 + pURAin-TDH3cp-SrpR-VP16
	H4587	H3900 + pURAin-TDH3cp-PhlF-VP16
	H4588	H3900 + pURAin-TDH3cp-TetR-VP16
	H4589	H3900 + pURAin-TDH3cp-TarA-VP16
	H4590	H3900 + pURAin-TDH3cp-Bm3R1-VP16
	H4873	H3900 + pURAin-00851cp-Bm3R1-VP16
	H4874	H3900 + pURAin-53301cp-Bm3R1-VP16
Venus wo sTF strains	H4751	H3900 + pLEUin_8BS(LexA)_ENO1cp-Venus + pURA (selection marker only)	*
	H4752	H3900 + pLEUin_8BS(SrpR)_ENO1cp-Venus + pURA (selection marker only)	*
	H4753	H3900 + pLEUin_8BS(PhlF)_ENO1cp-Venus + pURA (selection marker only)	*
	H4754	H3900 + pLEUin_8BS(TetR)_ENO1cp-Venus + pURA (selection marker only)	*
	H4755	H3900 + pLEUin_8BS(Bm3R1)_ENO1cp-Venus + pURA (selection marker only)	*
	H4756	H3900 + pLEUin_8BS(TarA)_ENO1cp-Venus + pURA (selection marker only)	*
sTF + Venus expression strains	LexA
	H4601	H4585 + pLEUin_0_BS_ENO1cp_Venus	*
	H4602	H4585 + pLEUin_1_BS(LexA)_ENO1cp_Venus	*
	H4603	H4585 + pLEUin_2_BS(LexA)_ENO1cp_Venus	*
	H4604	H4585 + pLEUin_4_BS(LexA)_ENO1cp_Venus	*
	H4605	H4585 + pLEUin_8_BS(LexA)_ENO1cp_Venus	*
	SrpR
	H4606	H4586 + pLEUin_0_BS_ENO1cp_Venus	*
	H4607	H4586 + pLEUin_1_BS(SrpR)_ENO1cp_Venus	*
	H4608	H4586 + pLEUin_2_BS(SrpR)_ENO1cp_Venus	*
	H4609	H4586 + pLEUin_4_BS(SrpR)_ENO1cp_Venus	*
	H4610	H4586 + pLEUin_8_BS(SrpR)_ENO1cp_Venus	*
	PhlF
	H4611	H4587 + pLEUin_0_BS_ENO1cp_Venus	*
	H4612	H4587 + pLEUin_1_BS(PhlF)_ENO1cp_Venus	*
	H4613	H4587 + pLEUin_2_BS(PhlF)_ENO1cp_Venus	*
	H4614	H4587 + pLEUin_4_BS(PhlF)_ENO1cp_Venus	*
	H4615	H4587 + pLEUin_8_BS(PhlF)_ENO1cp_Venus	*
	TetR
	H4616	H4588 + pLEUin_0_BS_ENO1cp_Venus	*
	H4617	H4588 + pLEUin_1_BS(tetR)_ENO1cp_Venus	*
	H4618	H4588 + pLEUin_2_BS(tetR)_ENO1cp_Venus	*
	H4619	H4588 + pLEUin_4_BS(tetR)_ENO1cp_Venus	*
	H4620	H4588 + pLEUin_8_BS(tetR)_ENO1cp_Venus	*
	BM3R1
	H4621	H4590 + pLEUin_0BS_ENO1cp_Venus	*
	H4622	H4590 + pLEUin_1BS(Bm3R1)_ENO1cp_Venus	*
	H4623	H4590 + pLEUin_2BS(Bm3R1)_ENO1cp_Venus	*
	H4624	H4590 + pLEUin_4BS(Bm3R1)_ENO1cp_Venus	*
	H4625	H4590 + pLEUin_8BS(Bm3R1)_ENO1cp_Venus	*
	TarA
	H4626	H4589 + pLEUin_0BS_ENO1cp_Venus	*
	H4627	H4589 + pLEUin_1BS(TarA)_ENO1cp_Venus	*
	H4628	H4589 + pLEUin_2BS(TarA)_ENO1cp_Venus	*
	H4629	H4589 + pLEUin_4BS(TarA)_ENO1cp_Venus	*
	H4630	H4589 + pLEUin_8BS(TarA)_ENO1cp_Venus	*
	With 00851cp
	H4876	H4873 + pLEUin_0BS_ENO1cp_Venus	*
	H4877	H4873 + pLEUin_1BS(Bm3R1)_ENO1cp_Venus	*
	H4878	H4873 + pLEUin_2BS(Bm3R1)_ENO1cp_Venus	*
	H4879	H4873 + pLEUin_4BS(Bm3R1)_ENO1cp_Venus	*
	H4880	H4873 + pLEUin_8BS(Bm3R1)_ENO1cp_Venus	*
	With 53301cp
	H4881	H4874 + pLEUin_0BS_ENO1cp_Venus	*
	H4882	H4874 + pLEUin_1BS(Bm3R1)_ENO1cp_Venus	*
	H4883	H4874 + pLEUin_2BS(Bm3R1)_ENO1cp_Venus	*
	H4884	H4874 + pLEUin_4BS(Bm3R1)_ENO1cp_Venus	*
	H4885	H4874 + pLEUin_8BS(Bm3R1)_ENO1cp_Venus	*
Orthogonality test	LexA-VP16 + 8BS-ENO1cp-Venus
	H4641	H4585 + pLEUin-8BS (SrpR)_ENO1cp-Venus	*
	H4642	H4585 + pLEUin-8BS (PhlF)_ENO1cp-Venus	*
	H4643	H4585 + pLEUin-8BS (TetR)_ENO1cp-Venus	*
	H4644	H4585 + pLEUin-8BS (Bm3R1)_ENO1cp-Venus	*
	H4645	H4585 + pLEUin-8BS (TarA)_ENO1cp-Venus	*
	SrpR-VP16 + 8BS-ENO1cp-Venus
	H4646	H4586 + pLEUin-8BS (LexA)_ENO1cp-Venus	*
	H4647	H4586 + pLEUin-8BS (PhlF)_ENO1cp-Venus	*
	H4648	H4586 + pLEUin-8BS (TetR)_ENO1cp-Venus	*
	H4649	H4586 + pLEUin-8BS (Bm3R1)_ENO1cp-Venus	*
	H4650	H4586 + pLEUin-8BS (TarA)_ENO1cp-Venus	*
	PhlF-VP16 + 8BS-ENO1cp-Venus
	H4651	H4587 + pLEUin-8BS (LexA)_ENO1cp-Venus	*
	H4652	H4587 + pLEUin-8BS (SrpR)_ENO1cp-Venus	*
	H4653	H4587 + pLEUin-8BS (TetR)_ENO1cp-Venus	*
	H4654	H4587 + pLEUin-8BS (Bm3R1)_ENO1cp-Venus	*
	H4655	H4587 + pLEUin-8BS (TarA)_ENO1cp-Venus	*
	TetR-VP16 + 8BS-ENO1cp-Venus
	H4656	H4588 + pLEUin-8BS (LexA)_ENO1cp-Venus	*
	H4657	H4588 + pLEUin-8BS (SrpR)_ENO1cp-Venus	*
	H4658	H4588 + pLEUin-8BS (PhlF)_ENO1cp-Venus	*
	H4659	H4588 + pLEUin-8BS (Bm3R1)_ENO1cp-Venus	*
	H4660	H4588 + pLEUin-8BS (TarA)_ENO1cp-Venus	*
	BM3R1-VP16 + 8BS-ENO1cp-Venus
	H4661	H4590 + pLEUin-8BS (LexA)_ENO1cp-Venus	*
	H4662	H4590 + pLEUin-8BS (SrpR)_ENO1cp-Venus	*
	H4663	H4590 + pLEUin-8BS (PhlF)_ENO1cp-Venus	*
	H4664	H4590 + pLEUin-8BS (TetR)_ENO1cp-Venus	*
	H4665	H4590 + pLEUin-8BS (TarA)_ENO1cp-Venus	*
	TarA-VP16 + 8BS-ENO1cp-Venus
	H4675	H4589 + pLEUin-8BS(LexA)-ENO1cp-Venus	*
	H4676	H4589 + pLEUin-8BS(SrpR)-ENO1cp-Venus	*
	H4677	H4589 + pLEUin-8BS(PhlF)-ENO1cp-Venus	*
	H4678	H4589 + pLEUin-8BS(TetR)-ENO1cp-Venus	*
	H4679	H4589 + pLEUin-8BS(Bm3R1)-ENO1cp-Venus	*
Native promoter analysis	H5127	H3895 + pURA-THI4p-Venus-PDC5t
		H4489 + pGREin-BID-GAL1p-BFP-THI4p-Venus
LexA-VP16 + repressor	H4695	H4489 + pURAin-THI4p- SrpR
	H4697	H4489 + pURAin-THI4p- PhlF
	H4699	H4489 + pURAin-THI4p-TetR
	H4701	H4489 + pURAin-THI4p-LacI
	H4703	H4489 + pURAin-THI4p-Bm3R1
Repressor experiment	With sTF and wo repressor
	H4783	H4766 + pLEUin-4 BS (LexA)-PGK1cp-Venus		*
	H4784	H4766 + pLEUin-4 BS (LexA)-(PGK1-SrpR)cp-Venus		*
	H4785	H4766 + pLEUin-4 BS (LexA)-(PGK1-PhlF)cp-Venus		*
	H4786	H4766 + pLEUin-4 BS (LexA)-(PGK1-TetR)cp-Venus		*
	H4787	H4766 + pLEUin-4 BS (LexA)-(PGK1-Bm3R1)cp-Venus		*
	H4788	H4766 + pLEUin-4 BS (LexA)-(PGK1-LacI)cp-Venus		*
	H4789	H4766 + pLEUin-4 BS(LexA)-ENO1cp-Venus		*
	H4790	H4766 + pLEUin-4 BS (LexA)-(ENO1-SrpR)cp-Venus		*
	H4791	H4766 + pLEUin-4 BS (LexA)-(ENO1-PhlF)cp-Venus		*
	H4792	H4766 + pLEUin-4 BS (LexA)-(ENO1-TetR)cp-Venus		*
	H4793	H4766 + pLEUin-4 BS (LexA)-(ENO1-Bm3R1)cp Venus		*
	H4794	H4766 + pLEUin-4 BS (LexA)-(ENO1-LacI)cp-Venus		*
	H4795	H4766 + pLEUin-4 BS (LexA)-THI4cp-Venus		*
	H4796	H4766 + pLEUin-4 BS (LexA)-(THI4-SrpR)cp-Venus		*
	H4797	H4766 + pLEUin-4 BS (LexA)-(THI4-PhlF)cp-Venus		*
	H4798	H4766 + pLEUin-4 BS (LexA)-(THI4-TetR)cp-Venus		*
	H4799	H4766 + pLEUin-4 BS (LexA)-(THI4-Bm3R1)cp-Venus		*
	H4800	H4766 + pLEUin-4 BS (LexA)-(THI4-LacI)cp-Venus		*
	H4801	H4766 + pLEUin-4 BS (LexA)-533cp-Venus		*
	H4802	H4766 + pLEUin-4 BS (LexA)-(533-SrpR)cp-Venus		*
	H4803	H4766 + pLEUin-4 BS (LexA)-(533-PhlF)cp-Venus		*
	H4804	H4766 + pLEUin-4 BS (LexA)-(533-TetR)cp-Venus		*
	H4805	H4766 + pLEUin-4 BS (LexA)-(533-Bm3R1)cp-Venus		*
	H4806	H4766 + pLEUin-4 BS (LexA)-(533-LacI)cp-Venus		*
	H4807	H4766 + pLEUin-4 BS (LexA)-114cp-Venus		*
	H4808	H4766 + pLEUin-4 BS (LexA)-(114-SrpR)cp-Venus		*
	H4809	H4766 + pLEUin-4 BS (LexA)-(114-PhlF)cp-Venus		*
	H4810	H4766 + pLEUin-4 BS (LexA)-(114-TetR)cp-Venus		*
	H4811	H4766 + pLEUin-4 BS (LexA)-(114-Bm3R1)cp-Venus		*
	H4812	H4766 + pLEUin-4 BS (LexA)-(114-LacI)cp-Venus		*
	H4813	H4766 + pLEUin-4 BS (LexA)-Tr123cp-Venus		*
	H4814	H4766 + pLEUin-4 BS (LexA)-(Tr123-SrpR)cp-Venus		*
	H4815	H4766 + pLEUin-4 BS (LexA)-(T.r.123-PhlF)cp-Venus		*
	H4816	H4766 + pLEUin-4 BS (LexA)-(Tr123-TetR)cp-Venus		*
	H4817	H4766 + pLEUin-4 BS (LexA)-(Tr123-Bm3R1)cp-Venus		*
	H4818	H4766 + pLEUin-4 BS (LexA)-(Tr123-LacI)cp-Venus		*
	with sTF and repressor
	H4900	H4695 + pLEU2in-4 BS (LexA)-(PGK1-SrpR)cp-Venus		*
	H4901	H4697 + pLEU2in-4 BS (LexA)-(PGK1-PhlF)cp-Venus		*
	H4902	H4699 + pLEU2in-4 BS (LexA)-(PGK1-TetR)cp-Venus		*
	H4887	H4703 + pLEU2in-4 BS (LexA)-(PGK1-Bm3R1)cp-Venus		*
	H4904	H4701 + pLEU2in-4 BS (LexA)-(PGK1-LacI)cp-Venus		*
	H4905	H4695 + pLEU2in-4 BS (LexA)-(ENO1-SrpR)cp-Venus		*
	H4906	H4697 + pLEU2in-4 BS (LexA)-(ENO1-PhlF)cp-Venus		*
	H4907	H4699 + pLEU2in-4 BS (LexA)-(ENO1-TetR)cp-Venus		*
	H4888	H4703 + pLEU2in-4 BS (LexA)-(ENO1-Bm3R1)cp Venus		*
	H4908	H4701 + pLEU2in-4 BS (LexA)-(ENO1-LacI)cp-Venus		*
	H4909	H4695 + pLEU2in-4 BS (LexA)-(THI4-SrpR)cp-Venus		*
	H4910	H4697 + pLEU2in-4 BS (LexA)-(THI4-PhlF)cp-Venus		*
	H4911	H4699 + pLEU2in-4 BS (LexA)-(THI4-TetR)cp-Venus		*
	H4889	H4703 + pLEU2in-4 BS (LexA)-(THI4-Bm3R1)cp-Venus		*
	H4912	H4701 + pLEU2in-4 BS (LexA)-(THI4-LacI)cp-Venus		*
	H4913	H4695 + pLEU2in-4 BS (LexA)-(533-SrpR)cp-Venus		*
	H4914	H4697 + pLEU2in-4 BS (LexA)-(533-PhlF)cp-Venus		*
	H4915	H4699 + pLEU2in-4 BS (LexA)-(533-TetR)cp-Venus		*
	H4890	H4703 + pLEU2in-4 BS (LexA)-(533-Bm3R1)cp-Venus		*
	H4916	H4701 + pLEU2in-4 BS (LexA)-(533-LacI)cp-Venus		*
	H4917	H4695 + pLEU2in-4 BS (LexA)-(114-SrpR)cp-Venus		*
	H4918	H4697 + pLEU2in-4 BS (LexA)-(114-PhlF)cp-Venus		*
	H4919	H4699 + pLEU2in-4 BS (LexA)-(114-TetR)cp-Venus		*
	H4891	H4703 + pLEU2in-4 BS (LexA)-(114-Bm3R1)cp-Venus		*
	H4920	H4701 + pLEU2in-4 BS (LexA)-(114-LacI)cp-Venus		*
	H4921	H4695 + pLEU2in-4 BS (LexA)-(Tr123-SrpR)cp-Venus		*
	H4922	H4697 + pLEU2in-4 BS (LexA)-(Tr123-PhlF)cp-Venus		*
	H4923	H4699 + pLEU2in-4 BS (LexA)-(Tr123-TetR)cp-Venus		*
	H4892	H4703 + pLEU2in-4 BS (LexA)-(Tr123-Bm3R1)cp-Venus		*
	H4924	H4701 + pLEU2in-4 BS (LexA)-(Tr123-LacI)cp-Venus		*
Bi-stable switch strains	With fluorescent proteins
	H5206	Bi-stable switch Ver A
	H5208	Bi-stable switch Ver B
	With Violacein pathway
	H5284	VioABE background strain
	H5285	Bi-stable switch Ver C
